# Supplementary material for: Nociceptor Deletion of Tsc2 Enhances Axon Regeneration by Inducing a Conditioning Injury Response in Dorsal Root Ganglia
Source: eNeuro. 2019 Jun 25;6(3):ENEURO.0168-19.2019. doi: 10.1523/ENEURO.0168-19.2019 (PMC6595439; doi:10.1523/ENEURO.0168-19.2019)
Supplement: Extended Data Figure 1-1 — Data values, biological replicates, and statistics supporting Figure 1. Download Figure 1-1, XLSX file. [file sup_enu-eN-NWR-0168-19-s01.xlsx]

## Sheet: Sheet1
Figure 1-1. Data values, biological replicates and statistics supporting Figure 1.
Figure	Condition	Values (mean ± SEM)	N (male,female)	Statistical test	Conditions compared	Statistical values	Significant?
1C	1 day control	0.894 ± 0.052 mm	6 (3,3)	unpaired t test, two-tailed	1 day: control vs. Tsc2 cKO	p < 0.0001	Yes
time	1 day Tsc2 cKO	1.532 ± 0.053 mm	6 (2,4)		2 day: control vs. Tsc2 cKO	p < 0.0001	Yes
course	2 day control	2.212 ± 0.087 mm	7 (3,4)		3 day: control vs. Tsc2 cKO	p < 0.0001	Yes
	2 day Tsc2 cKO	3.395 ± 0.034 mm	7 (3,4)
	3 day control	4.347 ± 0.097 mm	8 (5,3)
	3 day Tsc2 cKO	5.435 ± 0.103 mm	8 (5,3)
1D	Sham control	0.894 ± 0.052 mm	6 (3,3)	Ordinary one-way ANOVA	all	F = 46.54, p < 0.0001	Yes
in vivo	Sham Tsc2 cKO	1.532 ± 0.053 mm	6 (2,4)	Tukey's multiple comparisons test	Sham control vs. Sham Tsc2 cKO	p < 0.0001	Yes
conditioning	Conditioned control	1.852 ± 0.079 mm	6 (4,2)		Sham control vs. Conditioned control	p < 0.0001	Yes
	Conditioned Tsc2 cKO	1.869 ± 0.077 mm	6 (4,2)		Sham control vs. Conditioned Tsc2 cKO	p < 0.0001	Yes
					Sham Tsc2 cKO vs. Conditioned control	p = 0.0145	Yes
					Sham Tsc2 cKO vs. Conditioned Tsc2 cKO	p = 0.0097	Yes
					Conditioned control vs. Conditioned Tsc2 cKO	p = 0.9977	No
