# Supplementary material for: Nociceptor Deletion of Tsc2 Enhances Axon Regeneration by Inducing a Conditioning Injury Response in Dorsal Root Ganglia
Source: eNeuro. 2019 Jun 25;6(3):ENEURO.0168-19.2019. doi: 10.1523/ENEURO.0168-19.2019 (PMC6595439; doi:10.1523/ENEURO.0168-19.2019)
Supplement: Extended Data Figure 2-1 — Data values, biological replicates, and statistics supporting Figure 2. Download Figure 2-1, XLSX file. [file sup_enu-eN-NWR-0168-19-s02.xlsx]

## Sheet: Sheet1
Figure 2-1. Data values, biological replicates and statistics supporting Figure 2.
Figure	Condition	Values (mean ± SEM)	N (male,female)	Statistical test	Conditions compared	Statistical values	Significant?
2B	Vehicle control	4.348 ± 0.097 mm	8 (5,3)	Repeat measure one-way ANOVA	all	F = 29.06, p < 0.0001	Yes
	Post rapamycin control	4.013 ± 0.134 mm	8 (4,4)	Tukey's multiple comparisons test	Vehicle control vs. Post rapamycin control	p = 0.3273	No
	Pre + post rapamycin control	3.881 ± 0.156 mm	8 (4,4)		Vehicle control vs. Pre + post rapamycin control	p = 0.0657	No
	Vehicle Tsc2 cKO	5.435 ± 0.103 mm	8 (5,3)		Vehicle control vs. Vehicle Tsc2 cKO	p < 0.0001	Yes
	Post rapamycin Tsc2 cKO	5.143 ± 0.089 mm	8 (5,3)		Vehicle control vs. Post rapamycin Tsc2 cKO	p = 0.0002	Yes
	Pre + post rapamycin Tsc2 cKO	4.530 ± 0.128 mm	8 (4,4)		Vehicle control vs. Pre + post rapamycin Tsc2 cKO	p = 0.5660	No
					Post rapamycin control vs. Pre + post rapamycin control	p = 0.9637	No
					Post rapamycin control vs. Vehicle Tsc2 cKO	p < 0.0001	Yes
					Post rapamycin control vs. Post rapamycin Tsc2 cKO	p < 0.0001	Yes
					Post rapamycin control vs. Pre + post rapamycin Tsc2 cKO	p = 0.0090	Yes
					Pre + post rapamycin control vs. Vehicle Tsc2 cKO	p < 0.0001	Yes
					Pre + post rapamycin control vs. Post rapamycin Tsc2 cKO	p < 0.0001	Yes
					Pre + post rapamycin control vs. Pre + post rapamycin Tsc2 cKO	p = 0.0009	Yes
					Vehicle Tsc2 cKO vs. Post rapamycin Tsc2 cKO	p = 0.4763	No
					Vehicle Tsc2 cKO vs. Pre + post rapamycin Tsc2 cKO	p = 0.0003	Yes
					Post rapamycin Tsc2 cKO vs. Pre + post rapamycin Tsc2 cKO	p = 0.0405	Yes
