# Supplementary material for: Nociceptor Deletion of Tsc2 Enhances Axon Regeneration by Inducing a Conditioning Injury Response in Dorsal Root Ganglia
Source: eNeuro. 2019 Jun 25;6(3):ENEURO.0168-19.2019. doi: 10.1523/ENEURO.0168-19.2019 (PMC6595439; doi:10.1523/ENEURO.0168-19.2019)
Supplement: Extended Data Figure 5-1 — Data values, biological replicates, and statistics supporting Figure 5. Download Figure 5-1, XLSX file. [file sup_enu-eN-NWR-0168-19-s04.xlsx]

## Sheet: Sheet1
Figure 5-1. Data values, biological replicates and statistics supporting Figure 5.
Figure	Condition	Values (mean ± SEM)	N (male,female)	Statistical test	Conditions compared	Statistical values	Significant?
5B	all neurons: Uninjured control	21.8 ± 1.3 %	4 (2,2)	Ordinary one-way ANOVA	all	F = 135.0, p < 0.0001	Yes
cJun	all neurons: Uninjured Tsc2 cKO	46.1 ± 2.7 %	4 (2,2)	Tukey's multiple comparisons test	Uninjured control vs. Uninjured Tsc2 cKO	p < 0.0001	Yes
	all neurons: Transection control	77.1 ± 3.8 %	4 (2,2)		Uninjured control vs. Transection control	p < 0.0001	Yes
	all neurons: Transection Tsc2 cKO	82.9 ± 0.8 %	4 (2,2)		Uninjured control vs. Transection Tsc2 cKO	p < 0.0001	Yes
					Uninjured Tsc2 cKO vs. Transection control	p < 0.0001	Yes
					Uninjured Tsc2 cKO vs. Transection Tsc2 cKO	p < 0.0001	Yes
					Transection control vs. Transection Tsc2 cKO	p = 0.3712	No
5B	IB4-positive: Uninjured control	13.5 ± 1.2 %	4 (2,2)	Ordinary one-way ANOVA	all	F = 136.6, p < 0.0001	Yes
cJun	IB4-positive: Uninjured Tsc2 cKO	69.4 ± 4.2 %	4 (2,2)	Tukey's multiple comparisons test	Uninjured control vs. Uninjured Tsc2 cKO	p < 0.0001	Yes
	IB4-positive: Transection control	78.8 ± 3.8 %	4 (2,2)		Uninjured control vs. Transection control	p < 0.0001	Yes
	IB4-positive: Transection Tsc2 cKO	90.3 ± 0.9 %	4 (2,2)		Uninjured control vs. Transection Tsc2 cKO	p < 0.0001	Yes
					Uninjured Tsc2 cKO vs. Transection control	p = 0.1610	No
					Uninjured Tsc2 cKO vs. Transection Tsc2 cKO	p = 0.0014	Yes
					Transection control vs. Transection Tsc2 cKO	p = 0.0681	No
5B	IB4-negative: Uninjured control	24.9 ± 1.7 %	4 (2,2)	Ordinary one-way ANOVA	all	F = 154.2, p < 0.0001	Yes
cJun	IB4-negative: Uninjured Tsc2 cKO	30.1 ± 1.6 %	4 (2,2)	Tukey's multiple comparisons test	Uninjured control vs. Uninjured Tsc2 cKO	p = 0.4291	No
	IB4-negative: Transection control	76.4 ± 3.8 %	4 (2,2)		Uninjured control vs. Transection control	p < 0.0001	Yes
	IB4-negative: Transection Tsc2 cKO	77.6 ± 1.2 %	4 (2,2)		Uninjured control vs. Transection Tsc2 cKO	p < 0.0001	Yes
					Uninjured Tsc2 cKO vs. Transection control	p < 0.0001	Yes
					Uninjured Tsc2 cKO vs. Transection Tsc2 cKO	p < 0.0001	Yes
					Transection control vs. Transection Tsc2 cKO	p = 0.9820	No
5C	all neurons: Uninjured control	0.3 ± 0.1 %	4 (2,2)	Brown-Forsythe ANOVA	all	F = 16.72, p = 0.0012	Yes
Atf3	all neurons: Uninjured Tsc2 cKO	14.2 ± 2.6 %	4 (2,2)	Games-Howell's multiple	Uninjured control vs. Uninjured Tsc2 cKO	p = 0.0379	Yes
	all neurons: Transection control	35.4 ± 6.0 %	4 (2,2)	multiple comparisons test	Uninjured control vs. Transection control	p =0.0292	Yes
	all neurons: Transection Tsc2 cKO	48.7 ± 6.3 %	4 (2,2)		Uninjured control vs. Transection Tsc2 cKO	p =0.0139	Yes
					Uninjured Tsc2 cKO vs. Transection control	p = 0.0959	No
					Uninjured Tsc2 cKO vs. Transection Tsc2 cKO	p =0.0245	Yes
					Transection control vs. Transection Tsc2 cKO	p = 0.4747	No
5C	IB4-positive: Uninjured control	0.2 ± 0.2 %	4 (2,2)	Brown-Forsythe ANOVA	all	F = 22.65, p = 0.0006	Yes
Atf3	IB4-positive: Uninjured Tsc2 cKO	26.0 ± 3.5 %	4 (2,2)	Games-Howell's multiple	Uninjured control vs. Uninjured Tsc2 cKO	p = 0.0156	Yes
	IB4-positive: Transection control	40.1 ± 7.3 %	4 (2,2)	multiple comparisons test	Uninjured control vs. Transection control	p =0.0362	Yes
	IB4-positive: Transection Tsc2 cKO	53.0 ± 7.5 %	4 (2,2)		Uninjured control vs. Transection Tsc2 cKO	p =0.0176	Yes
					Uninjured Tsc2 cKO vs. Transection control	p = 0.4109	No
					Uninjured Tsc2 cKO vs. Transection Tsc2 cKO	p =0.0924	No
					Transection control vs. Transection Tsc2 cKO	p = 0.6339	No
5C	IB4-negative: Uninjured control	0.4 ± 0.1 %	4 (2,2)	Brown-Forsythe ANOVA	all	F = 29.74, p = 0.0002	Yes
Atf3	IB4-negative: Uninjured Tsc2 cKO	6.0 ± 2.3 %	4 (2,2)	Games-Howell's multiple	Uninjured control vs. Uninjured Tsc2 cKO	p = 0.2364	No
	IB4-negative: Transection control	33.5 ± 5.5 %	4 (2,2)	multiple comparisons test	Uninjured control vs. Transection control	p =0.0266	Yes
	IB4-negative: Transection Tsc2 cKO	45.4 ± 5.3 %	4 (2,2)		Uninjured control vs. Transection Tsc2 cKO	p =0.0103	Yes
					Uninjured Tsc2 cKO vs. Transection control	p = 0.0319	Yes
					Uninjured Tsc2 cKO vs. Transection Tsc2 cKO	p =0.0079	Yes
					Transection control vs. Transection Tsc2 cKO	p = 0.4633	No
5F	Vehicle control	0 ± 0	8 (5,3)	Repeat measure one-way ANOVA	all	F = 41.08, p < 0.0001	Yes
p-S6	Rapamycin control	- 1.98 ± 0.25	8 (4,4)	Tukey's multiple comparisons test	Vehicle control vs. Rapamycin control	p = 0.0004	Yes
/S6	Vehicle Tsc2 cKO	0.44 ± 0.20	8 (5,3)		Vehicle control vs. Vehicle Tsc2 cKO	p = 0.2182	No
	Rapamycin Tsc2 cKO	- 1.18 ± 0.28	8 (5,3)		Vehicle control vs. Rapamycin Tsc2 cKO	p = 0.0166	Yes
					Rapamycin control vs. Vehicle Tsc2 cKO	p = 0.0001	Yes
					Rapamycin control vs. Rapamycin Tsc2 cKO	p = 0.1395	No
					Vehicle Tsc2 cKO vs. Rapamycin Tsc2 cKO	p < 0.0001	Yes
5F	Vehicle control	0 ± 0	7 (5,2)	Repeat measure one-way ANOVA	all	F = 28.17, p < 0.0001	Yes
cJun	Rapamycin control	0.45 ± 0.38	7 (4,3)	Tukey's multiple comparisons test	Vehicle control vs. Rapamycin control	p = 0.6462	No
	Vehicle Tsc2 cKO	3.29 ± 0.43	7 (5,2)		Vehicle control vs. Vehicle Tsc2 cKO	p = 0.0011	Yes
	Rapamycin Tsc2 cKO	2.07 ± 0.35	7 (5,2)		Vehicle control vs. Rapamycin Tsc2 cKO	p = 0.0042	Yes
					Rapamycin control vs. Vehicle Tsc2 cKO	p = 0.0037	Yes
					Rapamycin control vs. Rapamycin Tsc2 cKO	p = 0.0676	No
					Vehicle Tsc2 cKO vs. Rapamycin Tsc2 cKO	p = 0.0069	Yes
5F	Vehicle control	0 ± 0	8 (5,3)	Repeat measure one-way ANOVA	all	F = 23.18, p < 0.0001	Yes
Atf3	Rapamycin control	0.81 ± 0.52	7 (4,3)	Tukey's multiple comparisons test	Vehicle control vs. Rapamycin control	p = 0.4555	No
	Vehicle Tsc2 cKO	4.63 ± 0.52	8 (5,3)		Vehicle control vs. Vehicle Tsc2 cKO	p = 0.0004	Yes
	Rapamycin Tsc2 cKO	2.59 ± 0.61	8 (5,3)		Vehicle control vs. Rapamycin Tsc2 cKO	p = 0.0159	Yes
					Rapamycin control vs. Vehicle Tsc2 cKO	p = 0.0032	Yes
					Rapamycin control vs. Rapamycin Tsc2 cKO	p = 0.1498	No
					Vehicle Tsc2 cKO vs. Rapamycin Tsc2 cKO	p = 0.0157	Yes
5F	Vehicle control	0 ± 0	8 (5,3)	Repeat measure one-way ANOVA	all	F = 6.744, p = 0.0141	Yes
p-Stat3	Rapamycin control	- 0.34 ± 0.43	8 (4,4)	Tukey's multiple comparisons test	Vehicle control vs. Rapamycin control	p = 0.8611	No
/Stat3	Vehicle Tsc2 cKO	0.87 ± 0.23	8 (5,3)		Vehicle control vs. Vehicle Tsc2 cKO	p = 0.0255	Yes
	Rapamycin Tsc2 cKO	0.73 ± 0.38	8 (5,3)		Vehicle control vs. Rapamycin Tsc2 cKO	p = 0.3009	No
					Rapamycin control vs. Vehicle Tsc2 cKO	p = 0.0320	Yes
					Rapamycin control vs. Rapamycin Tsc2 cKO	p = 0.0089	Yes
					Vehicle Tsc2 cKO vs. Rapamycin Tsc2 cKO	p = 0.9262	No
