# Supplementary material for: Nociceptor Deletion of Tsc2 Enhances Axon Regeneration by Inducing a Conditioning Injury Response in Dorsal Root Ganglia
Source: eNeuro. 2019 Jun 25;6(3):ENEURO.0168-19.2019. doi: 10.1523/ENEURO.0168-19.2019 (PMC6595439; doi:10.1523/ENEURO.0168-19.2019)
Supplement: Extended Data Figure 8-1 — Data values, biological replicates, and statistics supporting Figure 8. Download Figure 8-1, XLSX file. [file sup_enu-eN-NWR-0168-19-s07.xlsx]

## Sheet: Sheet1
Figure 8-1. Data values, biological replicates and statistics supporting Figure 8.
Figure	Condition	Values (mean ± SEM)	N (male,female)	Statistical test	Conditions compared	Statistical values	Significant?
8B	Control-AAV	93.7 ± 1.1 %	9 (3,6)	Welch's t test, two-tailed	Control-AAV vs. Tsc2 KO-AAV	p < 0.0001	Yes
Tsc2	Tsc2 KO-AAV	36.8 ± 5.3 %	11 (5,6)
8C	Control-AAV	14.2 ± 1.8 %	9 (3,6)	Welch's t test, two-tailed	Control-AAV vs. Tsc2 KO-AAV	p = 0.0001	Yes
cJun	Tsc2 KO-AAV	38.3 ± 4.2 %	11 (5,6)	Linear regression	Tsc2 KO-AAV: cJun vs Tsc2 expression	R square = 0.6335, p = 0.0034	Yes
8D	Control-AAV	0.8 ± 0.3 %	9 (3,6)	Welch's t test, two-tailed	Control-AAV vs. Tsc2 KO-AAV	p = 0.0012	Yes
Atf3	Tsc2 KO-AAV	15.0 ± 3.2 %	11 (5,6)	Linear regression	Tsc2 KO-AAV: Atf3 vs Tsc2 expression	R square = 0.4188, p = 0.0314	Yes
8E	Control-AAV	84.5 ± 18.7 square pixels/neuron	9 (3,6)	Welch's t test, two-tailed	Control-AAV vs. Tsc2 KO-AAV	p = 0.1443	Yes
Iba1	Tsc2 KO-AAV	151.7 ± 39.4 square pixels/neuron	11 (5,6)	Linear regression	Tsc2 KO-AAV: Iba1+ area/neuron vs Tsc2 expression	R square = 0.4007, p = 0.0366	Yes
